# Supplementary material for: The single-particle mixing state and cloud scavenging of black carbon: a case study at a high-altitude mountain site in southern China
Source: Copernicus journal article supplement (doi:10.5194/acp-17-14975-2017), 2017-12-19
Supplement: Supplementary file 1 [file acp-17-14975-2017-supplement.pdf]

Supplement of Atmos. Chem. Phys., 17, 14975–14985, 2017  
<https://doi.org/10.5194/acp-17-14975-2017-supplement>  
© Author(s) 2017. This work is distributed under  
the Creative Commons Attribution 4.0 License.

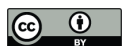

Atmospheric  
Chemistry  
and Physics  
Open Access  
EGU

*Supplement of*

## **The single-particle mixing state and cloud scavenging of black carbon: a case study at a high-altitude mountain site in southern China**

**Guohua Zhang et al.**

*Correspondence to:* Xinhui Bi ([bixh@gig.ac.cn](mailto:bixh@gig.ac.cn))

The copyright of individual parts of the supplement might differ from the CC BY 4.0 License.

## 23 **SPAMS**

24 Individual particles are introduced into SPAMS through a critical orifice. They are focused  
25 and accelerated to specific velocities, determined by two continuous diode Nd:YAG laser beams  
26 (532 nm), which are used to trigger a pulsed laser (266 nm) to desorp/ionize the particles. The  
27 produced positive and negative molecular fragments are recorded. In summary, a velocity, a  
28 detection moment, and an ion mass spectrum are recorded for each ionized particle, while there is  
29 no mass spectrum for not ionized particles. The velocity could be converted to  $d_{va}$  based on a  
30 calibration using polystyrene latex spheres (PSL, Duke Scientific Corp., Palo Alto) with  
31 predefined sizes. The accuracy for the derived  $d_{va}$  is within  $\pm 10\%$ .

32

## 33 **Aethalometer data analysis**

34 The absorption coefficients at seven different wavelengths (370, 450, 520, 590, 660, 880 and  
35 950 nm) were obtained by the Aethalometers. A variable attenuation (ATN), is defined to  
36 represent the filter attenuation through the sample spot on a filter (Weingartner et al., 2003;  
37 Arnott et al., 2005; Backman et al., 2016). It is well known that the measured ATN may differ  
38 from the true aerosol absorption due to ‘filter loading effect’, a phenomenon which appears as a  
39 gradual decrease of instrumental response as the aerosol loading on the filter increases (Arnott et  
40 al., 2005). Therefore, two calibration factors are introduced to convert aethalometer attenuation  
41 measurements to “real” absorption coefficient (Weingartner et al., 2003). At 880 nm wavelength,  
42 light absorption can be attributed to BC alone rather than the other aerosol particles due to their  
43 significantly less absorption at long wavelength (e.g., Sandradewi et al., 2008; Yang et al., 2009).  
44 For AE-31, a specific attenuation cross-section  $\sigma_{ATN}$  of  $16.6 \text{ m}^2 \text{ g}^{-1}$ , recommended by the  
45 manufacturer, was applied to calculate the EBC concentration with the equation:  $EBC =$   
46  $b_{ATN}/\sigma_{ATN}$ , where  $b_{ATN}$  is the optical attenuation coefficient. For AE-33, the ATN was converted  
47 to an EBC concentration using the mass absorption cross section of  $7.77 \text{ m}^2 \text{ g}^{-1}$  according to the  
48 method recommended by Drinovec et al. (2015).

49 The AE-31 used in the present study may suffer from the effects described above. Differently,  
50 the AE-33 has been improved by the incorporation of a filter loading correction part, based on a  
51 two parallel spot measurement of optical absorption. It could provide a real-time output of the  
52 “loading compensation” parameter to compensate for the “loading effect”. The details of the  
53 principle of operation, data deduction, and error budget of the AE-33, the inherent uncertainties in  
54 its technique and the corrections are extensively available in the literature (Drinovec et al., 2015).  
55 Therefore, we reported EBC concentration from the results of AE-33. The detection limit for EBC  
56 measurements is  $< 10 \text{ ng m}^{-3}$  with uncertainty at  $\sim 2 \text{ ng m}^{-3}$  at the time-base of 1 minute  
57 (<http://www.mageesci.com/>). As noted in the manuscript and Fig. S10, the EBC measured by AE-  
58 31 is significantly correlated ( $R^2 = 0.9$ ,  $p < 0.001$ ) with that measured by AE-33. Therefore, EBC  
59 concentrations derived from AE-31 were not corrected for the calculation of  $Mf_{\text{scav,EBC}}$ .

60 As shown in Fig. S10, AE-31 might underestimate  $\sim 15\%$  of EBC for cloud INT particles in the  
61 calculation of  $Mf_{\text{scav,EBC}}$ . It is also noted that a threshold of  $8 \mu\text{m}$  might underestimate the mass  
62 concentration of cloud RES EBC, since the size of droplets might extend to as low as  $3 \mu\text{m}$ .  
63 Unfortunately, the size distribution of cloud droplets was not available for our study. Therefore, we  
64 assumed that the largest underestimate of the cloud RES particles is 30% to assess the uncertainties  
65 for  $Mf_{\text{scav,EBC}}$  calculation. The mean  $Mf_{\text{scav,EBC}}$  was recalculated to be 30-36%, when the assumed  
66 largest underestimate (i.e., 30%) of the cloud RES particles and  $\sim 15\%$  underestimate of the cloud  
67 INT BC were taken into account in R1. Compared to mean  $Mf_{\text{scav,EBC}} = 33\%$ , the overall  
68 uncertainties for the estimate of mean  $Mf_{\text{scav,EBC}}$  is with 10%.

Table S1. Average mass concentrations, mass fractions relative to fine particles and scavenged fractions of BC from the literatures.

| Site                                                  | site type    | season (year)           | ave ( $\pm$ std)<br>( $\mu\text{g m}^{-3}$ ) | mass<br>fraction | Mf <sub>scav,EBC</sub><br>(%) | References                  |
|-------------------------------------------------------|--------------|-------------------------|----------------------------------------------|------------------|-------------------------------|-----------------------------|
| Shenzhen, Southern China                              | urban        | Summer (2011)           | $4.0 \pm 3.1$                                | ~11%             | - <sup>a</sup>                | (Lan, et al., 2013)         |
| Guangzhou, Southern China                             | urban        | Summer (2008)           | 8.86                                         | -                | -                             | (Wu, et al., 2013)          |
| Guangzhou, Southern China                             | urban        | Fall(2010)              | 4.3                                          | ~4% <sup>b</sup> | -                             | (Zhang, et al., 2013)       |
| Shenzhen, Southern China                              | urban        | Fall(2009)              | $6.0 \pm 6.3$                                | -                | -                             | (Huang, et al., 2012)       |
| Guangzhou, Southern China                             | Rural        | Summer (2008)           | 2.62                                         | -                | -                             | (Wu, et al., 2013)          |
| Ba Guang village, southern China                      | Rural        | Fall(2009)              | $2.6 \pm 1.0$                                | -                | -                             | (Huang, et al., 2012)       |
| Mt. Soledad (251 m m.s.l.)                            | marine       | Summer (2012)           | 0.07                                         | -                | -                             | (Schroder, et al., 2015)    |
| Yongxing Island, Southern China                       | marine       | Summer (2008)           | 0.54                                         | -                | -                             | (Wu, et al., 2013)          |
| A coastal Chilean hill, (Valparaíso),<br>450 m a.s.l. | low-altitude | Winter (2013)           | 0.34 - 0.95                                  | -                | 13 - 50                       | (Hitzenberger et al., 2016) |
| Puy de Dome (France), 1465 m a.s.l.                   | mid-altitude | Winter-spring<br>(2001) | -                                            | -                | 33 - 74                       | (Sellegri et al., 2003)     |
| Nova Scotia, Canada (Below 1 km)                      | mid-altitude | Summer (1993)           | $0.06 \pm 0.01$                              | -                | 2 - 32                        | (Chylek et al., 1996)       |

|                                                    |                   |               |             |   |         |                             |
|----------------------------------------------------|-------------------|---------------|-------------|---|---------|-----------------------------|
| Nova Scotia, Canada (1-3 km)                       | mid-high-altitude | Summer (1993) | 0.22 ± 0.03 | - | -       | (Chylek et al., 1996)       |
| Mt. Rax (1644 m a.s.l.)                            | high-altitude     | Spring (1999) | 0.43        | - | -       | (Hitzenberger et al., 2001) |
| Mt. Rax (1644 m a.s.l.)                            | high-altitude     | Spring (2000) | 0.72        | - | 54 ± 25 | (Hitzenberger et al., 2001) |
| Alpine Jungfrauoch (Switzerland),<br>3850 m a.s.l. | high-altitude     | Summer (2004) | 0.06        | - | 61      | (Cozic et al., 2007)        |
| Alpine Jungfrauoch (Switzerland),<br>3850 m a.s.l. | high-altitude     | Winter (2004) | 0.05        | - | -       | (Cozic et al., 2007)        |

---

70 <sup>a</sup> not available.

71 <sup>b</sup> mass fraction relative to PM<sub>3</sub>.

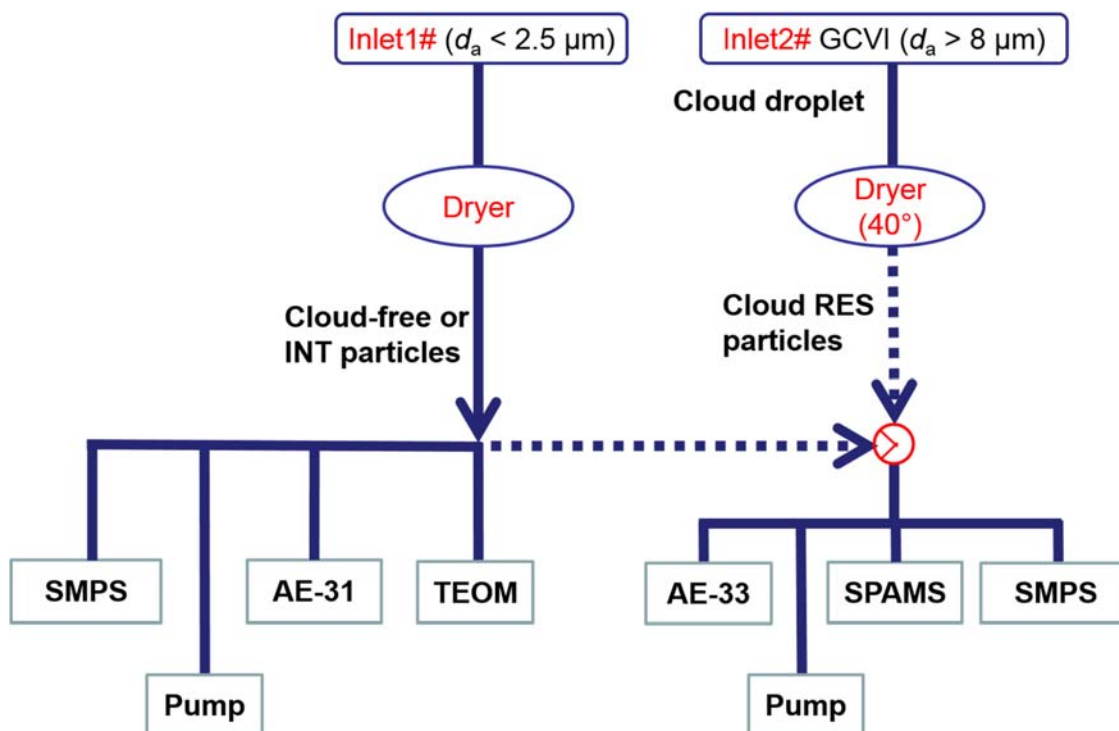

72

73

74 **Figure S1.** A scheme of the instrumentation setup in this study. The dash line  
 75 illustrates that the sampling pipe was either connected to Inlet 1# or Inlet 2#. As described  
 76 in section 2.1, the cloud INT and RES particles were intermittently measured by these  
 77 instruments during Cloud III, through manually connect the sampling pipe to either Inlet  
 78 1# or Inlet 2# at approximately one-hour intervals. The GCVI includes various sensors to  
 79 monitor the temperature/RH, visibility ([http://belfortinstrument.com/products/all-](http://belfortinstrument.com/products/all-environment-visibility-sensor/)  
 80 [environment-visibility-sensor/](http://belfortinstrument.com/products/all-environment-visibility-sensor/)), and rainfall/snow  
 81 (<http://www.meltyourice.com/products/controllers/ds-82/>). The integrated rainfall/snow  
 82 sensor helps to exclude sampling during rainy periods. TEOM  
 83 (<https://www.thermofisher.com>) measures the mass concentration of aerosol with the  
 84 detection limited of  $\sim 100 \text{ ng m}^{-3}$ , with an accuracy of  $\pm 0.75\%$ . MSP SMPS  
 85 (<https://www.mspscorp.com>) measures the number-based size distribution of particles

86 ranged between 10-1000 nm in 48 size bins, with a detection limit of  $\sim 1 \text{ cm}^{-3}$ , and an  
87 accuracy of  $\pm 10\%$ . Grimm SMPS (<https://www.mspcorp.com>) can measure the number-  
88 based size distribution of particles ranged between 10-1100 nm in 44 size bins, with a  
89 detection limit of  $\sim 1 \text{ cm}^{-3}$ , and an accuracy of  $\pm 5\%$ .

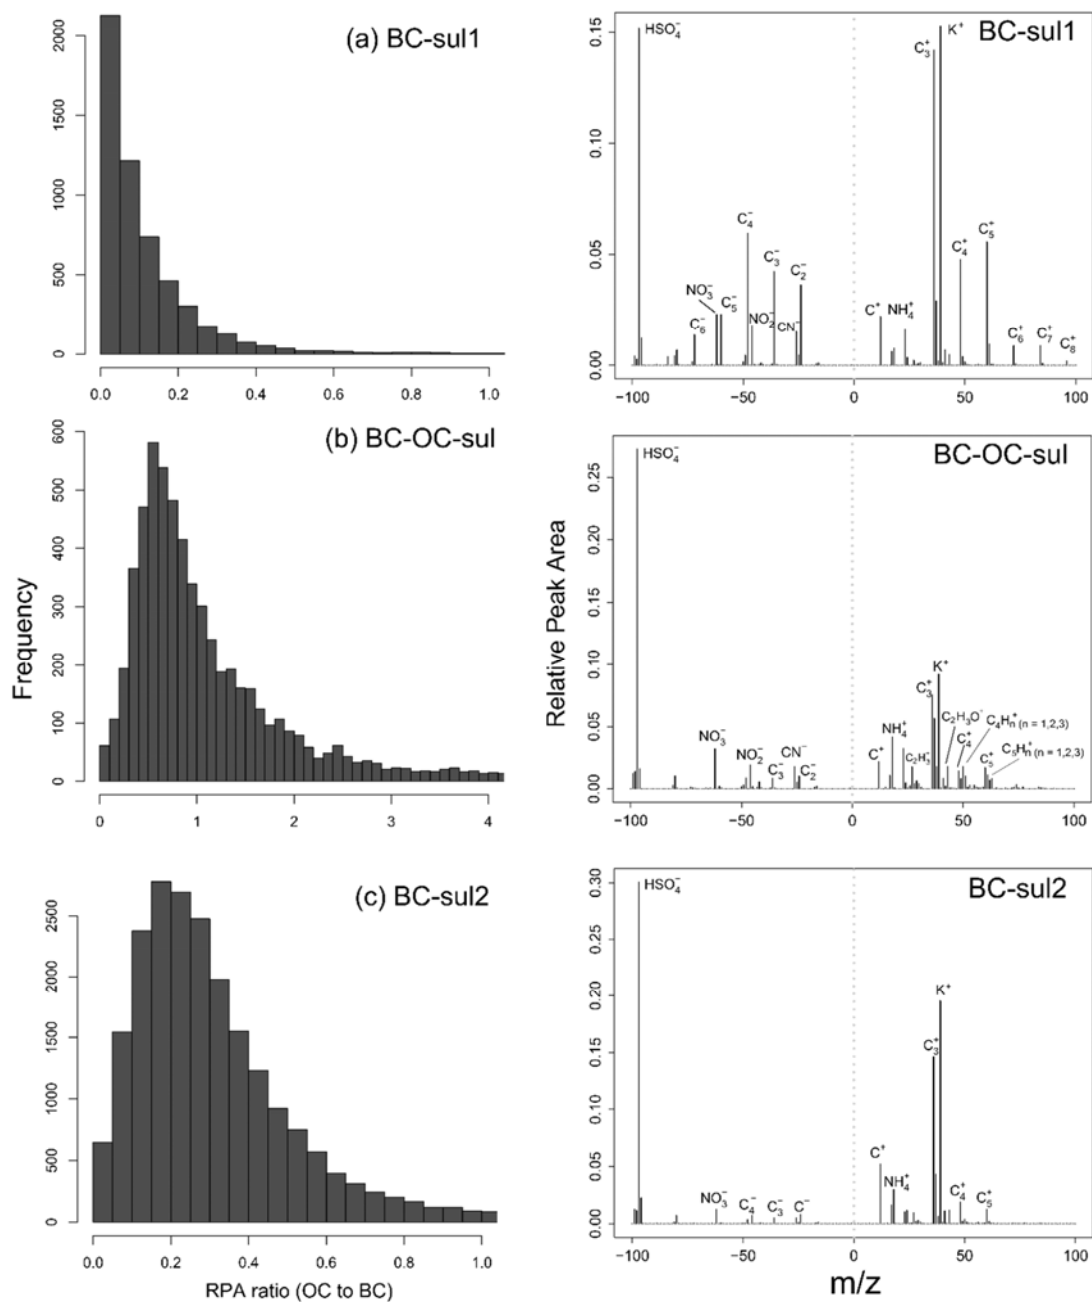

90

91 **Figure S2.** Statistic analysis on the RPA ratio of OC to BC (left), and the average mass  
 92 spectra (right) for the BC types. Markers were selected as m/z 27, 43, 50, 51, 61, 63, -26  
 93 for OC, and carbon ion clusters (C<sub>n</sub><sup>+/-</sup>, n ≤ 5) for BC, the same as those in Fig. 3. More  
 94 intense sulfate (RPA = ~0.3) was found for BC-sul2 and BC-OC-sul, relative to that



95 (RPA =  $\sim 0.15$ ) for BC-sul1 type. More abundance of OC was found for BC-OC-sul, the  
96 mean peak area ratio OC/BC of which is  $\sim 1$ , higher than those ( $< 0.3$ ) for other BC types.

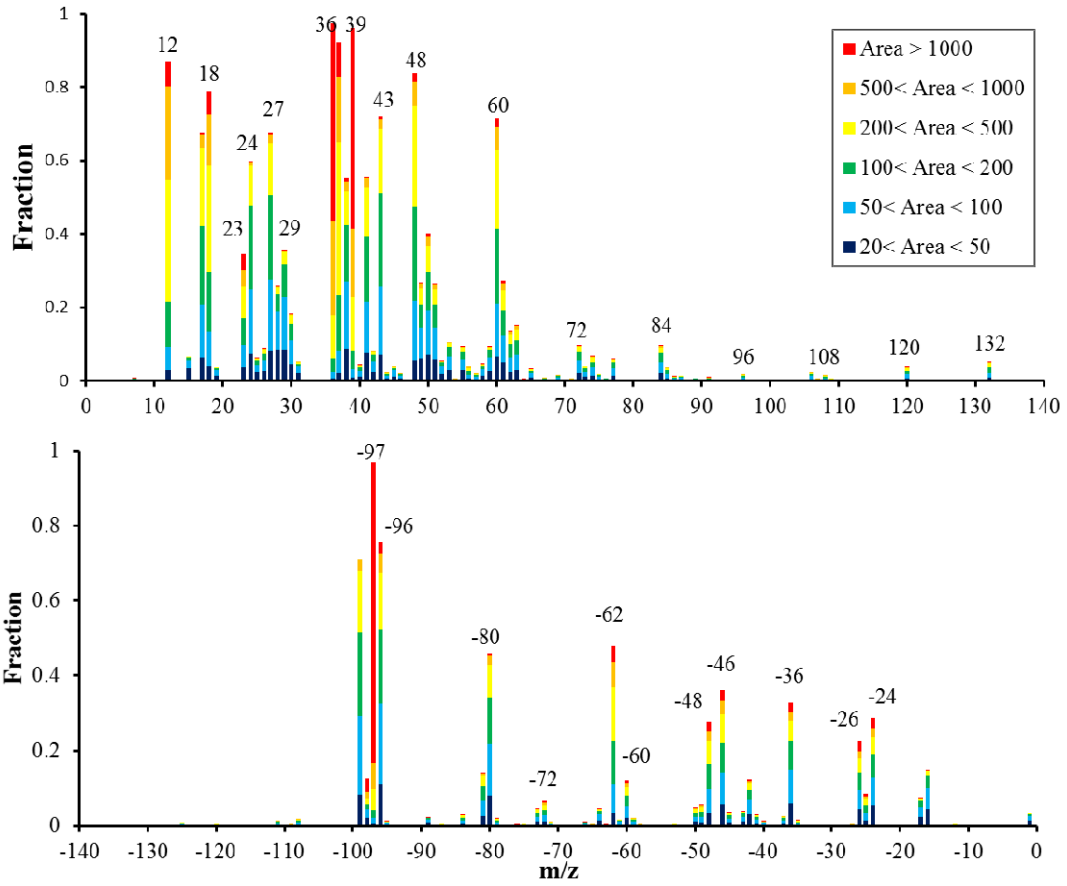

97

98 Figure S3. The number-based digitized mass spectrum of cloud-free BC-containing  
 99 particles at the remote high-altitude site. Y-axis indicates the number fraction of total  
 100 particles that had detectable amounts of these individual ion peaks.

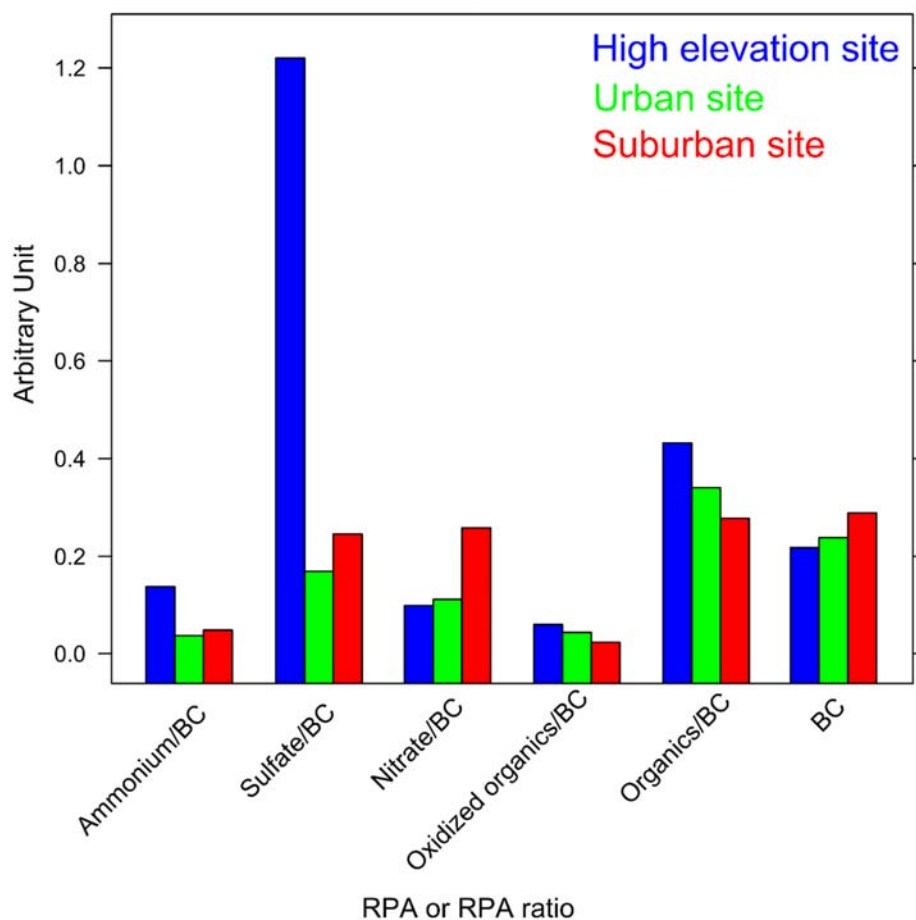

101

102 Figure S4. RPA ratio of ammonium (m/z 18), sulfate (m/z -97), nitrate (m/z -62),  
 103 oxidized organics (m/z 43), and other organics (m/z 27, 50, 51, 61, 63, -26) to BC, and  
 104 RPA of BC (carbon ion clusters ( $C_n^{+/-}$ ,  $n \leq 5$ )) at the high elevation site, urban  
 105 (Guangzhou), and suburban sites (Heshan) during winter in southern China. The particles  
 106 in Guangzhou and Heshan were similarly measured by SPAMS during winter. Despite of  
 107 matrix effects due to the laser desorption/ionization for SPAMS, advances have been  
 108 made in semi-quantifying individual chemical species, either through multivariate  
 109 analysis or by applying peak intensities for specific ions (e.g., Jeong et al., 2011; Xing et  
 110 al., 2011; Healy et al., 2013). RPA, defined as the peak area of each m/z divided by the

111 total dual ion mass spectral peak area, is related to the relative amount of a species on a  
112 particle. Compared to absolute peak area, RPA was commonly applied because it is less  
113 sensitive to the variability in ion intensities associated with particle-laser interactions. It  
114 is also noted that matrix effects might be lower when calculation was performed for  
115 similar particle type, i.e., BC-containing particles.

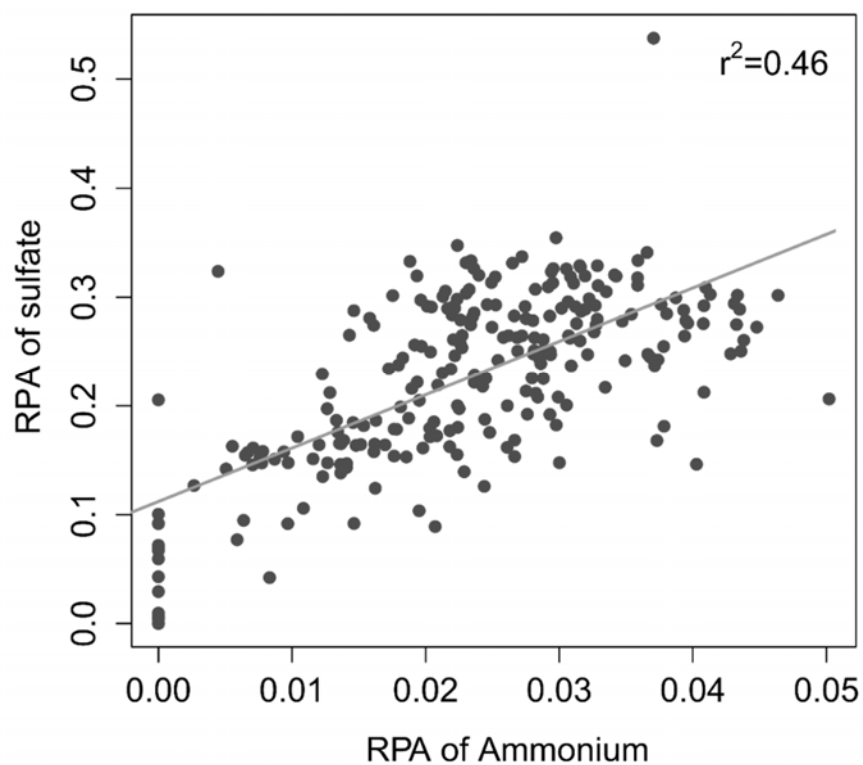

116

117 Figure S5. Correlation analysis of hourly average RPA for ammonium and sulfate  
118 associated with BC-containing particles. The correlation coefficient is a bit lower than  
119 expected might partly due to matrix effect in single particle mass spectrometry (e.g.,  
120 Jeong et al., 2011; Xing et al., 2011; Healy et al., 2013).

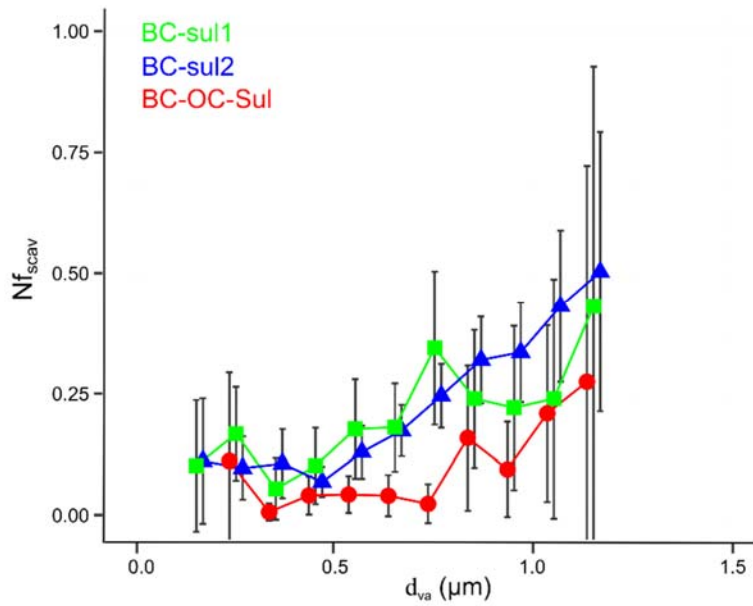

121

122 Figure S6. Size-resolved  $Nf_{act}$  estimated for three particle types of BC-containing  
 123 particles. Note that this data only collected during Cloud III event when both cloud RES  
 124 and INT particles were collected, however, not simultaneously but intermittently. It is  
 125 noted that although the  $Nf_{act}$  for BC-OC-sul type is lower than BC-sul types, the  $Nf_{act}$  for  
 126 all the BC-containing particles is similar to that of all the detected particles. We attributed  
 127 it to two reasons: (1) BC-OC-sul particles only accounted for  $\sim 20\%$  of BC-containing  
 128 particles, and (2) the other particles also contained OC-dominated particles ( $\sim 10\%$ ).

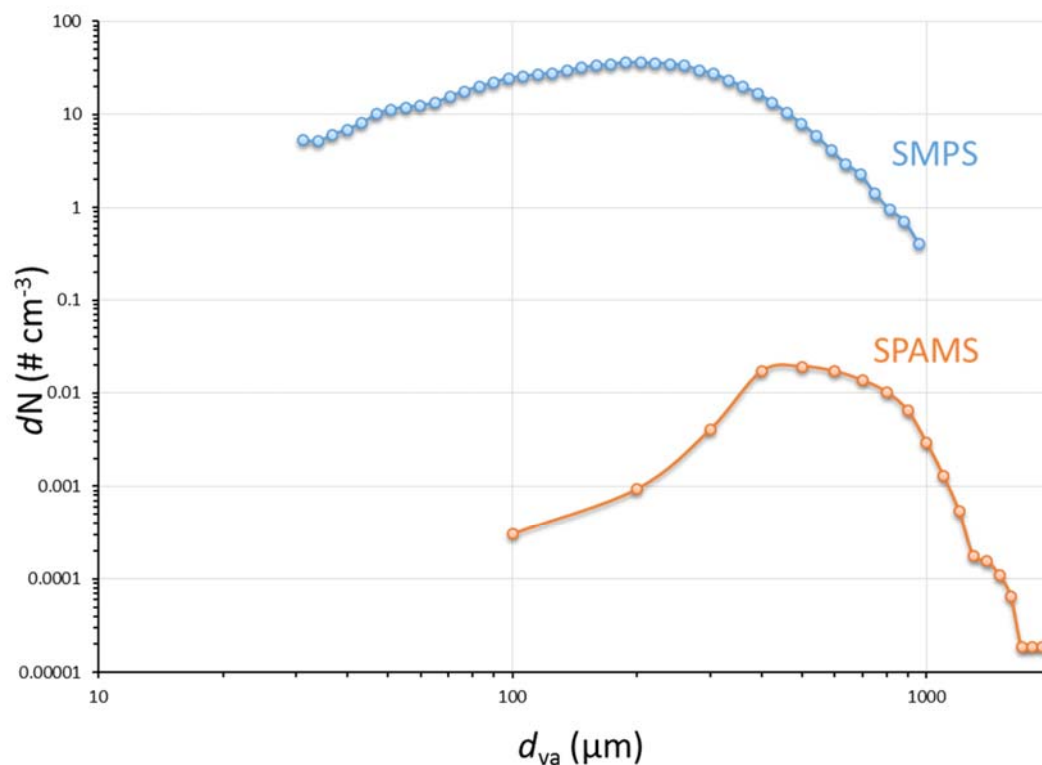

129

130 Figure S7. A representative comparison between the size distributions measured by the  
 131 SPAMS and the SMPS within 12 hours measurements. It should be noted that the  
 132 diameter is represented as  $d_{va}$  by SPAMS, while the diameter measured by the SMPS is  
 133 represented as electrical mobility diameter ( $d_m$ ). Herein, the  $d_m$  was first converted to the  
 134  $d_{va}$  for the comparison. The conversion could be simplified to  $d_m = d_{va} \cdot \rho_{eff} / \rho_0$  (DeCarlo et  
 135 al., 2004), where  $\rho_{eff}$  refers to the effective density,  $\rho_0$  is the unit density  $1.0 \text{ g cm}^{-3}$ . The  
 136  $\rho_{eff}$  is assumed to be  $1.5 \text{ g cm}^{-3}$  for the calculation (Hu et al., 2012).

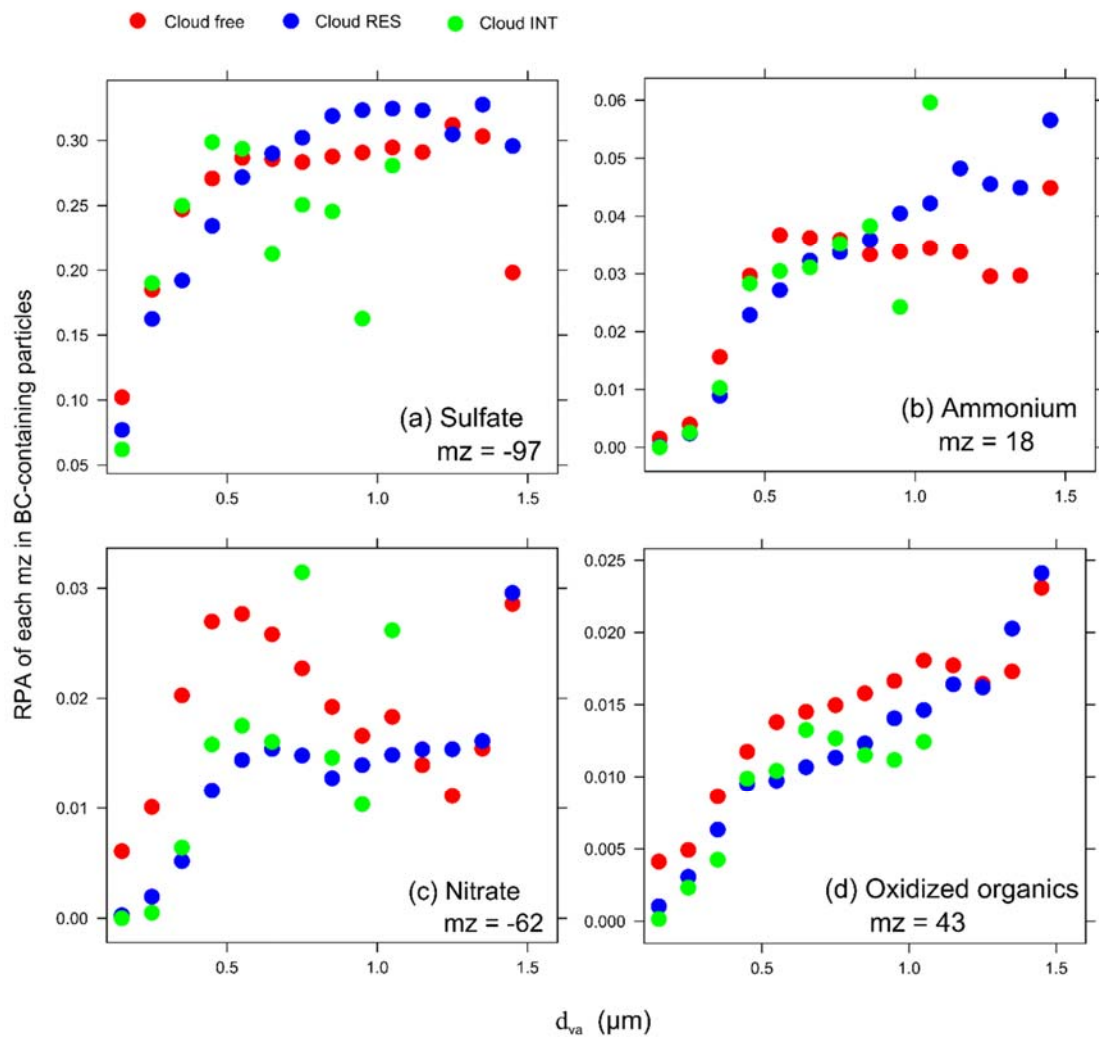

137

138 Figure S8. RPA of each secondary species associated with BC-containing particles in

139 cloud-free, INT, and RES particles as a function of particle sizes.



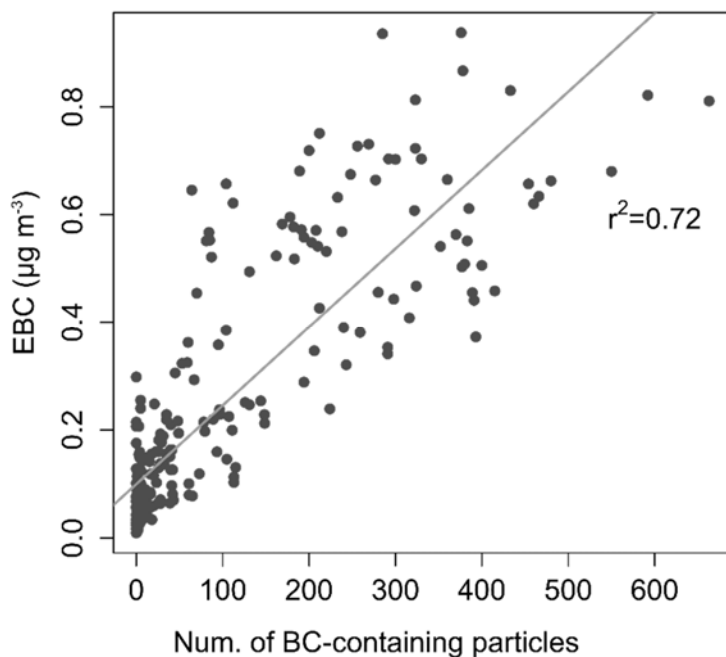

140

141 Figure S9. Correlation between time series of Num. of BC-containing particles and  
 142 concentration of EBC. The volume equivalent diameter of BC particles cores measured in  
 143 southern China was typically around 200 nm (Huang et al., 2011; Huang et al., 2012).  
 144 Huang et al. (2011) showed that a large fraction (> 60%) of BC particles are internally  
 145 mixed with a significant amount of non-refractory materials (coating thickness > 70 nm)  
 146 at a rural site in southern China. Furthermore, Yu et al. (2010) showed that over 50% of  
 147 BC are above 500 nm, also indicating internally mixed of BC, with regard that majority of  
 148 BC particles cores have volume equivalent diameter less than 500 nm (Huang et al., 2011;  
 149 Huang et al., 2012). As also discussed in section 3.1, BC-containing particles were already  
 150 heavily mixed with secondary species arriving at our site, and therefore they should be  
 151 larger enough for the detection by SPAMS.

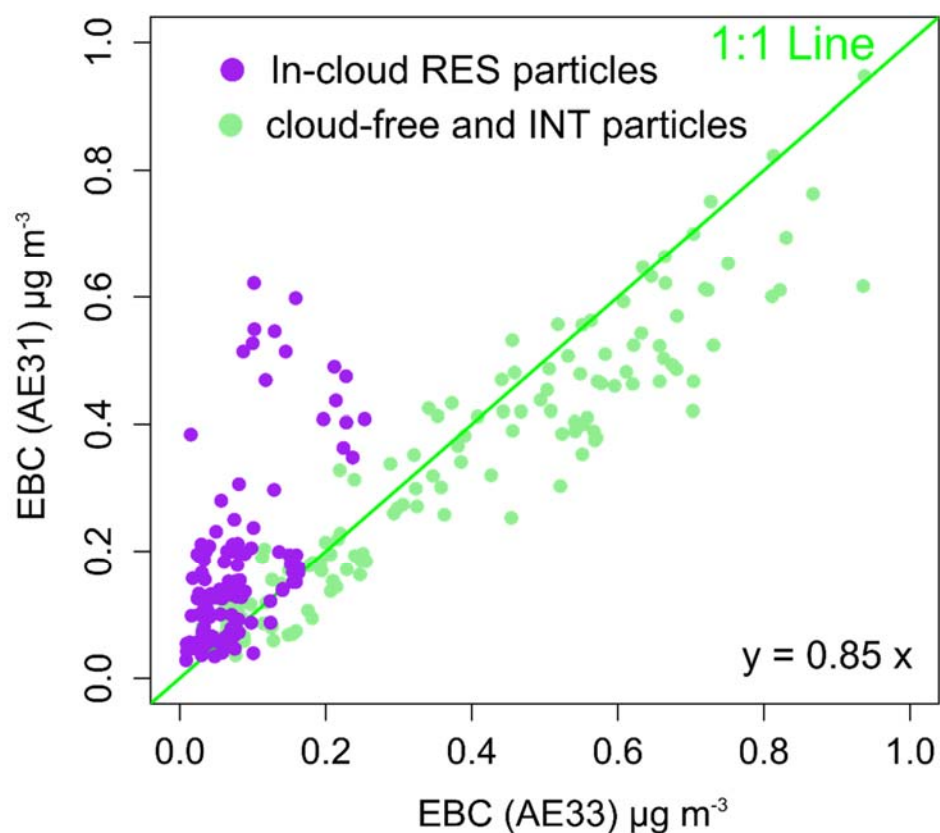

152

153 Figure S10. Correlation analysis of EBC measured by AE31 and AE33. They measured  
 154 the same aerosol for out-of-cloud (including cloud INT and cloud-free) particles. However,  
 155 during cloud events, AE33 measured cloud RES particles or cloud INT particles for some  
 156 periods, while AE31 measured cloud INT particles. Therefore, the EBC were compared  
 157 when the same aerosol were measured, as shown in green dots. The result indicates that  
 158 they are highly correlated, with EBC measured by AE31 only slightly lower than those by  
 159 AE33.

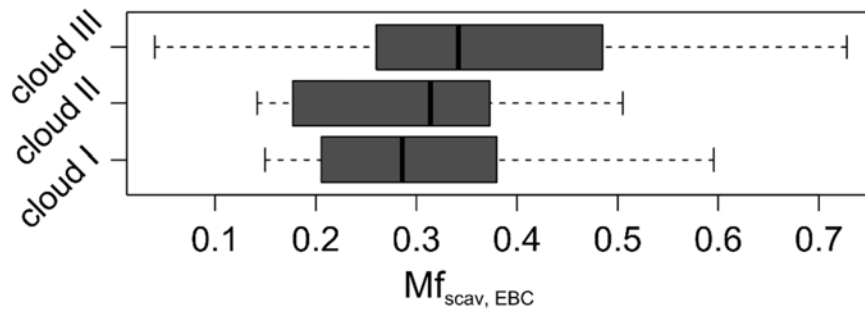

160

161 Figure S11. Box and whisker plot of  $Mf_{scav,EBC}$  for each cloud event. In a box and whisker  
 162 plot, the lower, median and upper lines of the box denote the 25<sup>th</sup>, 50<sup>th</sup>, and 75<sup>th</sup>  
 163 percentiles, respectively, and the lower and upper edges of the whisker denote the 10<sup>th</sup>  
 164 and 90<sup>th</sup> percentiles, respectively.

165 Reference

- 166 Arnott, W. P., Hamasha, K., Moosmuller, H., Sheridan, P. J., and Ogren, J. A.: Towards  
167 aerosol light-absorption measurements with a 7-wavelength Aethalometer:  
168 Evaluation with a photoacoustic instrument and 3-wavelength nephelometer, *Aerosol*  
169 *Sci. Tech.*, 39, 17-29, doi:10.1080/027868290901972, 2005.
- 170 Backman, J., Schmeisser, L., Virkkula, A., Ogren, J. A., Asmi, E., Starkweather, S.,  
171 Sharma, S., Eleftheriadis, K., Uttal, T., Jefferson, A., Bergin, M., and Makshtas, A.:  
172 On Aethalometer measurement uncertainties and multiple scattering enhancement in  
173 the Arctic, *Atmos. Meas. Tech. Discuss.*, 2016, 1-31, doi:10.5194/amt-2016-294,  
174 2016.
- 175 DeCarlo, P. F., Slowik, J. G., Worsnop, D. R., Davidovits, P., and Jimenez, J. L.: Particle  
176 morphology and density characterization by combined mobility and aerodynamic  
177 diameter measurements. Part 1: Theory, *Aerosol Sci. Tech.*, 38, 1185-1205,  
178 doi:10.1080/027868290903907, 2004.
- 179 Drinovec, L., Močnik, G., Zotter, P., Prévôt, A. S. H., Ruckstuhl, C., Coz, E., Rupakheti,  
180 M., Sciare, J., Müller, T., Wiedensohler, A., and Hansen, A. D. A.: The "dual-spot"  
181 Aethalometer: an improved measurement of aerosol black carbon with real-time  
182 loading compensation, *Atmos. Meas. Tech.*, 8, 1965-1979, doi:10.5194/amt-8-1965-  
183 2015, 2015.
- 184 Healy, R. M., Sciare, J., Poulain, L., Crippa, M., Wiedensohler, A., Prevot, A. S. H.,  
185 Baltensperger, U., Sarda-Estevé, R., McGuire, M. L., Jeong, C. H., McGillicuddy, E.,  
186 O'Connor, I. P., Sodeau, J. R., Evans, G. J., and Wenger, J. C.: Quantitative  
187 determination of carbonaceous particle mixing state in Paris using single-particle  
188 mass spectrometer and aerosol mass spectrometer measurements, *Atmos. Chem.*  
189 *Phys.*, 13, 9479-9496, doi:10.5194/acp-13-9479-2013, 2013.
- 190 Huang, X. F., Gao, R. S., Schwarz, J. P., He, L. Y., Fahey, D. W., Watts, L. A.,  
191 McComiskey, A., Cooper, O. R., Sun, T. L., Zeng, L. W., Hu, M., and Zhang, Y. H.:  
192 Black carbon measurements in the Pearl River Delta region of China, *J. Geophys.*  
193 *Res.*, 116, 445-451, doi:10.1029/2010jd014933, 2011.
- 194 Huang, X. F., Sun, T. L., Zeng, L. W., Yu, G. H., and Luan, S. J.: Black carbon aerosol

195 characterization in a coastal city in South China using a single particle soot  
196 photometer, *Atmos. Environ.*, 51, 21-28, doi:10.1016/j.atmosenv.2012.01.056, 2012.

197 Jeong, C. H., McGuire, M. L., Godri, K. J., Slowik, J. G., Rehbein, P. J. G., and Evans, G.  
198 J.: Quantification of aerosol chemical composition using continuous single particle  
199 measurements, *Atmos. Chem. Phys.*, 11, 7027-7044, doi:10.5194/acp-11-7027-2011,  
200 2011.

201 Sandradewi, J., Prevot, A. S. H., Szidat, S., Perron, N., Alfarra, M. R., Lanz, V. A.,  
202 Weingartner, E., and Baltensperger, U.: Using aerosol light absorption measurements  
203 for the quantitative determination of wood burning and traffic emission contributions  
204 to particulate matter, *Environ. Sci. Technol.*, 42, 3316-3323, 2008.

205 Weingartner, E., Saathoff, H., Schnaiter, M., Streit, N., Bitnar, B., and Baltensperger, U.:  
206 Absorption of light by soot particles: determination of the absorption coefficient by  
207 means of aethalometers, *J. Aerosol Sci.*, 34, 1445-1463,  
208 doi:[http://dx.doi.org/10.1016/S0021-8502\(03\)00359-8](http://dx.doi.org/10.1016/S0021-8502(03)00359-8), 2003.

209 Xing, J. H., Takahashi, K., Yabushita, A., Kinugawa, T., Nakayama, T., Matsumi, Y.,  
210 Tonokura, K., Takami, A., Imamura, T., Sato, K., Kawasaki, M., Hikida, T., and  
211 Shimono, A.: Characterization of Aerosol Particles in the Tokyo Metropolitan Area  
212 using Two Different Particle Mass Spectrometers, *Aerosol Sci. Tech.*, 45, 315-326,  
213 doi:10.1080/02786826.2010.533720, 2011.

214 Yang, M., Howell, S. G., Zhuang, J., and Huebert, B. J.: Attribution of aerosol light  
215 absorption to black carbon, brown carbon, and dust in China - interpretations of  
216 atmospheric measurements during EAST-AIRE, *Atmos. Chem. Phys.*, 9, 2035-2050,  
217 2009.

218 Yu, H., Wu, C., Wu, D., and Yu, J. Z.: Size distributions of elemental carbon and its  
219 contribution to light extinction in urban and rural locations in the pearl river delta  
220 region, China, *Atmos. Chem. Phys.*, 10, 5107-5119, doi:10.5194/acp-10-5107-2010,  
221 2010.
